# Supplementary material
Source: PubMed Central journal article supplement (PMC3755359)
Supplement: NIHMS396487-supplement-Supplementary_Figure.pdf [file NIHMS396487-supplement-Supplementary_Figure.pdf]

Supplementary figures for reviewers:

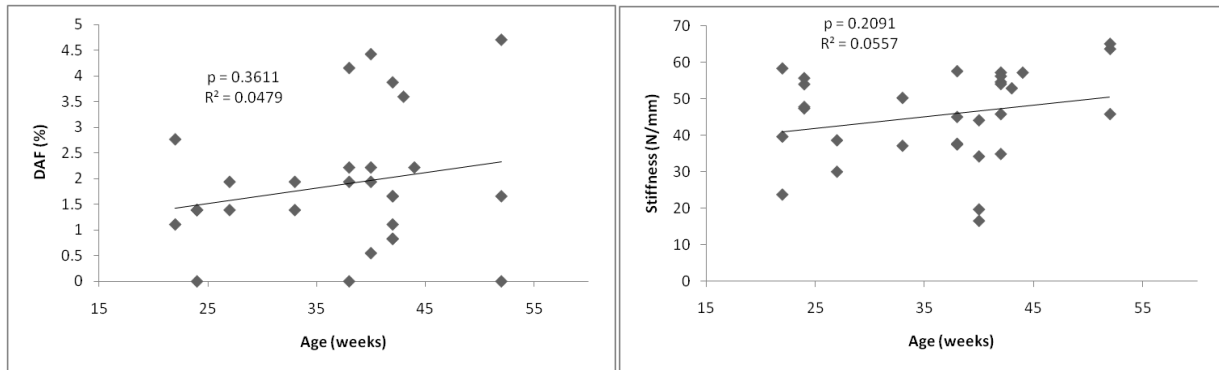

Supplementary figure. No significant correlations were observed between age and either DAF or stiffness within contralateral, healthy limbs.
